# Supplementary material
Source: publisher figshare collection journal article supplement (https://acs.figshare.com/ndownloader/files/6010494)
Supplement: Supplementary file 1 [file 6010494]

Supporting Information to

Molecular Self-Assembly Versus Surface

Restructuring During Calcite Dissolution

*Martin Nalbach, Stefanie Klassen, Ralf Bechstein, Angelika Kühnle\**

Institute of Physical Chemistry, Johannes Gutenberg University Mainz, Duesbergweg 10-14,  
55099 Mainz, Germany

## Experimental Section

Eriochrome Black T (EBT, ACS reagent, indicator grade), Eriochrome Blue Black B (EBBB, indicator (for complexometry)) and Eriochrome Blue Black R (EBBR, indicator (for complexometry (Al, Fe, Zr))) were purchased from Sigma Aldrich. Eriochrome Black A (EBA) and Eriochrome Red B (ERB) were purchased from TCI Deutschland GmbH. All dye molecules were used in the experiments without further purification.

### pH measurements

The pH measurements of the dye solutions prior to the AFM experiments were conducted using a Schott laboratory pH meter (CG 842) equipped with a BlueLine pH-electrode (Schott, 18 pH). The pH-electrode was calibrated weekly utilizing buffer standard solutions with a pH value of 4 and 7 (HANNA instruments, type Hi6004 and Hi6007).

### Species distribution calculation

EBT and EBA possessing one sulfonate and two hydroxyl groups each are both triprotic acids. For each protonation / deprotonation step, the acid dissociation constant ( $K_{ai}$ ) is defined by the quotient of the respective equilibrium concentrations.

$$K_{ai} = \frac{c(H_3O^+) \cdot c(H_{n-i}A^{i-})}{c(H_{n-i+1}A^{(i-1)-})} \quad \text{Eq. (S1)}$$

For EBT and EBA the acid dissociation constants ( $K_{ai}$ ) for the second and third protonation / deprotonation step are given as follows:<sup>1</sup>

**Table S1.** Acid dissociation constants for the second and third protonation / deprotonation step of EBT and EBA.

| Molecule | $-\lg K_{a2} = pK_{a2}$ | $-\lg K_{a3} = pK_{a3}$ |
|----------|-------------------------|-------------------------|
| EBT      | 6.30                    | 11.55                   |
| EBA      | 6.20                    | 13.00                   |

Calculation of the carbonate equilibrium species distribution was performed using the relevant protonation / deprotonation equilibrium equations for an  $n$ -protic acid ( $H_{n-i+1}A^{(i-1)-}$ ).<sup>2</sup>

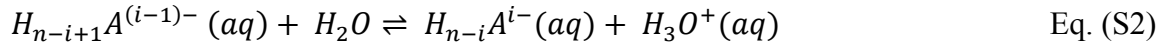

The total concentration ( $C$ ) for EBT and EBA is the sum over all protonated / deprotonated species being present in the solution at every pH.

$$C = \sum_{i=0}^n c(H_{n-i}A^{i-}(aq)) \quad \text{Eq. (S3)}$$

Numerical analysis of the resulting system of linear equations enables the precise determination of the equilibrium concentration of all protonated / deprotonated species at a given pH.

$$c(H_{n-i+1}A^{(i-1)-}) = \frac{c^{n-i}(H_3O^+) \cdot c(H_nA) \cdot \prod_{j=1}^i K_{Sj}}{\sum_{r=0}^n [c^{n-r}(H_3O^+) \cdot \prod_{j=1}^r K_{Sj}]} \quad \text{Eq. (S4)}$$

The species distribution of EBT is illustrated in Figure 5a, the species distribution of EBA is illustrated in Figure S1.

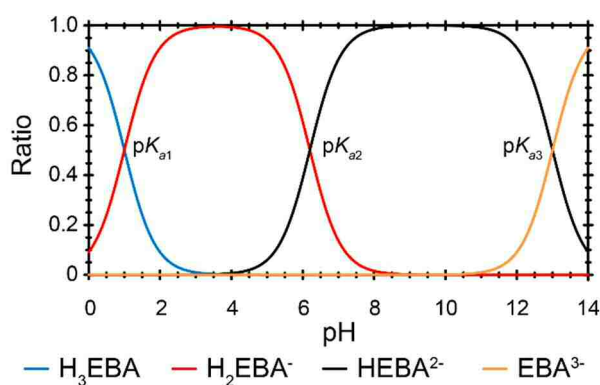

**Figure S1.** Species distribution of EBA as a function of the pH value.

### Azo-hydrazo tautomerization

We note that EBT can undergo an azo-hydrazo tautomerization,<sup>3</sup> resulting in three, four and one different species for the onefold, twofold and threefold deprotonated molecule, respectively. The azo-hydrazo tautomerization of a onefold deprotonated EBT molecule is shown in Figure 5a, the azo-hydrazo tautomerization of a twofold deprotonated EBT molecule is shown in Figure S2.

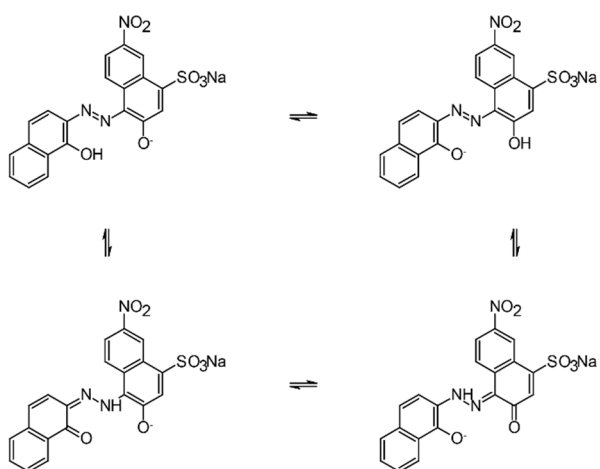

**Figure S2.** Azo-hydrazo tautomerization of a twofold deprotonated EBT molecule.

## References

- (1) Schwarzenbach, G.; Biedermann, W., *Helv. Chim. Acta* **1948**, *31*, 678-687.
- (2) Bliefert, C., *pH Wert Berechnungen*. ed.; Verlag Chemie: Weinheim, New York, 1978.
- (3) Sagaster, H.-R.; Röbisch, G.; Mehlhorn, A., *J. Prakt. Chem.* **1987**, *329*, 1045-1051.
